# Supplementary material
Source: PubMed Central journal article supplement (PMC6217726)
Supplement: jiy483_suppl_supplementary_file.pdf [file jiy483_suppl_supplementary_file.pdf]

## SUPPLEMENTARY FILES

### SUPPLEMENTARY TABLES

**Supplementary Table S1.** Characteristics of cervical neoplasia cases in participating study populations.

| Studies       | Cases       | Controls     | Chip Type  | Histology       |                         |            | HPV status   |             |             |                               |                   |            |
|---------------|-------------|--------------|------------|-----------------|-------------------------|------------|--------------|-------------|-------------|-------------------------------|-------------------|------------|
|               |             |              |            | Adeno-carcinoma | Squamous cell carcinoma | Other      | HPV16 and 18 | HPV16 no 18 | HPV18 no 16 | Negative for tested HPV types | No HPV16 or HPV18 | Not tested |
| Montreal      | 95          | 0            | Omni       | N/A             | N/A                     | 95         | N/A          | N/A         | N/A         | N/A                           | N/A               | 95         |
| NCI [1]       | 194         | 0            | 660Q       | 97              | 88                      | 9          | N/A          | 38          | 14          | 93                            | 41                | 8          |
| NSW [2]       | 274         | 0            | Omni       | 10              | 256                     | 8          | 11           | 62          | 7           | 67                            | N/A               | 127        |
| CerGe [3]     | 98          | 0            | Omni       | N/A             | N/A                     | 98         | N/A          | N/A         | N/A         | N/A                           | N/A               | 98         |
| Seattle [4]   | 751         | 0            | 660Q       | 424             | 327                     | N/A        | 44           | 258         | 112         | 45                            | 34                | 258        |
| SUCCEED [1]   | 313         | 0            | 660Q       | 11              | 65                      | 237        | 17           | 194         | 18          | N/A                           | 69                | 15         |
| TOMBOLA[5]    | 324         | 0            | Omni       | N/A             | N/A                     | 324        | 16           | 115         | 15          | 177                           | 1                 | N/A        |
| NIH [3]       | 94          | 0            | 660Q       | N/A             | N/A                     | 94         | N/A          | N/A         | N/A         | N/A                           | N/A               | 94         |
| Immunochip    | 0           | 13428        | Immunochip | N/A             | N/A                     | N/A        | N/A          | N/A         | N/A         | N/A                           | N/A               | N/A        |
| <b>TOTALS</b> | <b>2143</b> | <b>13428</b> |            | <b>542</b>      | <b>736</b>              | <b>865</b> | <b>88</b>    | <b>667</b>  | <b>166</b>  | <b>382</b>                    | <b>145</b>        | <b>695</b> |

N/A, not available.

**Supplementary Table S2.** Allele frequencies of the key SNPs in the intersection between four input datasets and the reference panel of KIR\*IMP.

| SNPs                    | Position | Allele0 | Allele1 | Omni <sup>1</sup> | Ichip1 <sup>1</sup> | 660Q <sup>1</sup> | Ichip2 <sup>1</sup> |
|-------------------------|----------|---------|---------|-------------------|---------------------|-------------------|---------------------|
| seq-rs272408            | 55103603 | C       | T       | 0.82              | 0.82                | N/A               | N/A                 |
| seq-rs7255954           | 55109883 | A       | C       | 0.26              | 0.26                | 0.26              | 0.26                |
| seq-rs272411            | 55111727 | C       | T       | 0.32              | 0.29                | 0.31              | 0.29                |
| rs2363863               | 55111785 | C       | T       | 0.36              | 0.36                | 0.36              | 0.36                |
| seq-rs4806787           | 55112489 | A       | C       | 0.62              | 0.62                | N/A               | N/A                 |
| rs1000574               | 55114775 | C       | T       | 0.20              | 0.20                | 0.20              | 0.20                |
| seq-rs10411879          | 55123305 | A       | G       | 0.34              | 0.34                | 0.34              | 0.33                |
| seq-rs10423364          | 55128339 | G       | A       | 0.33              | 0.31                | N/A               | N/A                 |
| seq-rs8102351           | 55157042 | C       | T       | N/A               | N/A                 | 0.90              | 0.90                |
| seq-rs10419191          | 55159164 | G       | A       | 0.89              | 0.88                | 0.88              | 0.88                |
| seq-rs4806798           | 55166721 | A       | G       | 0.15              | 0.13                | 0.15              | 0.13                |
| seq-rs934434            | 55172146 | C       | T       | 0.52              | 0.55                | N/A               | N/A                 |
| seq-rs4806802           | 55173403 | G       | A       | 0.15              | 0.13                | 0.14              | 0.13                |
| seq-rs1749313           | 55173542 | G       | A       | N/A               | N/A                 | 0.08              | 0.08                |
| seq-rs1654668           | 55174213 | T       | C       | 0.56              | 0.55                | 0.56              | 0.55                |
| seq-rs17836409          | 55183869 | C       | T       | 0.12              | 0.12                | 0.11              | 0.12                |
| seq-rs1654656           | 55183977 | C       | T       | 0.49              | 0.48                | 0.49              | 0.48                |
| seq-t1d-19-59878067-G-A | 55186255 | G       | A       | 0.07              | 0.07                | N/A               | N/A                 |
| rs1749320               | 55187279 | A       | C       | 0.06              | 0.06                | 0.05              | 0.07                |
| seq-rs912735            | 55193435 | T       | C       | 0.80              | 0.79                | N/A               | N/A                 |
| seq-rs1654658           | 55194681 | A       | G       | 0.69              | 0.68                | 0.70              | 0.68                |
| seq-rs1654660           | 55195187 | G       | A       | 0.14              | 0.14                | 0.13              | 0.14                |
| seq-rs4806805           | 55205122 | T       | C       | 0.28              | 0.28                | N/A               | N/A                 |
| rs10422812              | 55206991 | C       | T       | 0.24              | 0.26                | 0.27              | 0.26                |
| rs11084366              | 55210598 | T       | G       | 0.33              | 0.35                | 0.37              | 0.35                |
| rs1952015               | 55211155 | C       | T       | N/A               | N/A                 | 0.86              | 0.84                |
| seq-rs10426302          | 55211547 | A       | G       | 0.82              | 0.82                | 0.83              | 0.81                |
| seq-rs8109557           | 55211859 | A       | G       | 0.86              | 0.85                | N/A               | N/A                 |
| seq-rs8107460           | 55214989 | T       | C       | 0.88              | 0.88                | N/A               | N/A                 |
| seq-rs4436877           | 55216162 | G       | A       | 0.26              | 0.26                | 0.28              | 0.26                |
| seq-rs1325156           | 55216950 | A       | G       | 0.84              | 0.83                | 0.85              | 0.83                |
| rs12151161              | 55217589 | G       | A       | N/A               | N/A                 | 0.90              | 0.89                |
| seq-rs11666535          | 55217660 | T       | G       | N/A               | N/A                 | 0.53              | 0.53                |
| rs270771                | 55220626 | C       | T       | N/A               | N/A                 | 0.05              | 0.05                |
| rs270779                | 55224260 | A       | G       | N/A               | N/A                 | 0.46              | 0.45                |
| seq-rs2296370           | 55224785 | G       | A       | 0.36              | 0.37                | 0.39              | 0.37                |
| seq-rs2296371           | 55224885 | G       | A       | 0.41              | 0.41                | 0.42              | 0.42                |
| rs10423751              | 55224967 | T       | C       | 0.59              | 0.58                | 0.58              | 0.58                |
| seq-rs11883241          | 55225613 | C       | T       | 0.30              | 0.29                | 0.30              | 0.29                |
| seq-rs6509899           | 55225835 | G       | A       | 0.10              | 0.10                | 0.10              | 0.10                |
| seq-rs1325158           | 55226402 | C       | T       | 0.37              | 0.37                | 0.37              | 0.37                |
| seq-rs7256392           | 55227879 | A       | G       | 0.96              | 0.96                | 0.97              | 0.96                |
| rs4806527               | 55228948 | G       | A       | 0.04              | 0.03                | N/A               | N/A                 |
| rs587560                | 55245738 | C       | T       | 0.31              | 0.30                | N/A               | N/A                 |
| rs17207376              | 55248072 | C       | A       | 0.69              | 0.69                | N/A               | N/A                 |
| seq-rs10409751          | 55249570 | C       | G       | N/A               | N/A                 | 0.33              | 0.33                |
| seq-rs597598            | 55315440 | G       | A       | 0.18              | 0.17                | 0.18              | 0.17                |
| rs3865507               | 55322376 | C       | A       | 0.03              | 0.03                | N/A               | N/A                 |
| seq-rs649216            | 55324635 | T       | C       | N/A               | N/A                 | 0.49              | 0.51                |
| rs145117817             | 55326739 | T       | C       | 0.41              | 0.43                | 0.42              | 0.42                |
| rs12461010              | 55332601 | C       | T       | 0.41              | 0.43                | N/A               | N/A                 |
| seq-rs1654644           | 55373362 | T       | G       | 0.34              | 0.34                | 0.36              | 0.34                |
| rs3826878               | 55377211 | A       | G       | 0.03              | 0.04                | N/A               | N/A                 |
| seq-rs17771967          | 55380214 | A       | G       | N/A               | N/A                 | 0.43              | 0.42                |
| rs11665986              | 55383941 | C       | T       | 0.19              | 0.19                | 0.18              | 0.19                |
| rs12462181              | 55385435 | T       | C       | 0.44              | 0.44                | N/A               | N/A                 |

|                         |          |   |   |      |      |      |      |
|-------------------------|----------|---|---|------|------|------|------|
| seq-rs3816051           | 55385604 | T | C | 0.48 | 0.48 | N/A  | N/A  |
| rs10407012              | 55387953 | A | G | 0.88 | 0.88 | N/A  | N/A  |
| rs7259347               | 55392755 | T | C | N/A  | N/A  | 0.16 | 0.16 |
| seq-rs4806608           | 55395582 | A | G | 0.19 | 0.20 | N/A  | N/A  |
| seq-rs1865096           | 55396900 | G | A | 0.27 | 0.28 | 0.29 | 0.28 |
| rs1865097               | 55397217 | G | A | 0.30 | 0.32 | N/A  | N/A  |
| seq-rs16986050          | 55401170 | G | A | 0.82 | 0.82 | 0.82 | 0.82 |
| rs7249884               | 55402691 | T | G | 0.04 | 0.04 | N/A  | N/A  |
| rs10421281              | 55412835 | A | C | 0.00 | 0.00 | N/A  | N/A  |
| rs2278427               | 55417731 | G | A | 0.09 | 0.08 | 0.09 | 0.08 |
| rs2278428               | 55418054 | A | C | 0.08 | 0.08 | 0.09 | 0.07 |
| seq-rs1433097           | 55418458 | T | C | 0.17 | 0.16 | N/A  | N/A  |
| rs16986072              | 55424307 | G | A | 0.02 | 0.01 | N/A  | N/A  |
| seq-rs1671160           | 55428459 | C | T | 0.25 | 0.26 | 0.26 | 0.26 |
| seq-rs11880295          | 55432529 | T | C | 0.94 | 0.94 | 0.94 | 0.94 |
| seq-rs775859            | 55433596 | C | T | 0.09 | 0.07 | 0.09 | 0.07 |
| seq-rs16986092          | 55433696 | C | T | 0.10 | 0.08 | 0.08 | 0.08 |
| rs12461856              | 55433852 | A | G | 0.16 | 0.16 | 0.17 | 0.16 |
| rs623383                | 55434575 | A | G | 0.52 | 0.52 | 0.53 | 0.52 |
| seq-rs634742            | 55434818 | G | A | 0.43 | 0.45 | 0.44 | 0.45 |
| seq-rs269938            | 55439821 | T | G | 0.61 | 0.62 | 0.61 | 0.62 |
| seq-rs269939            | 55439838 | G | A | N/A  | N/A  | 0.45 | 0.45 |
| seq-rs269940            | 55440357 | A | G | N/A  | N/A  | 0.45 | 0.45 |
| rs269949                | 55441769 | A | G | 0.44 | 0.46 | N/A  | N/A  |
| seq-rs269950            | 55441902 | C | T | 0.44 | 0.46 | N/A  | N/A  |
| seq-rs269951            | 55441995 | G | A | 0.44 | 0.46 | N/A  | N/A  |
| rs269955                | 55443424 | G | A | N/A  | N/A  | 0.41 | 0.42 |
| seq-rs269957            | 55445174 | T | C | 0.27 | 0.27 | 0.27 | 0.28 |
| seq-rs775876            | 55447572 | A | G | 0.62 | 0.62 | N/A  | N/A  |
| rs7359929               | 55447595 | A | G | 0.24 | 0.22 | 0.22 | 0.23 |
| seq-t1d-19-60139424-G-T | 55447612 | G | T | N/A  | N/A  | 0.22 | 0.23 |
| rs775879                | 55449755 | G | A | N/A  | N/A  | 0.62 | 0.62 |
| seq-rs775883            | 55451797 | T | C | 0.65 | 0.65 | 0.67 | 0.64 |
| seq-t1d-19-60150968-G-A | 55459156 | G | A | 0.17 | 0.17 | N/A  | N/A  |
| rs12460693              | 55469212 | C | A | N/A  | N/A  | 0.16 | 0.16 |
| seq-t1d-19-60179962-T-C | 55488150 | T | C | 0.16 | 0.17 | N/A  | N/A  |
| seq-rs775900            | 55489349 | G | A | N/A  | N/A  | 0.22 | 0.22 |
| seq-rs7254951           | 55495106 | G | A | 0.06 | 0.06 | 0.07 | 0.06 |
| seq-rs1036231           | 55497843 | T | C | 0.27 | 0.27 | 0.27 | 0.27 |
| rs10412569              | 55497855 | A | G | N/A  | N/A  | 0.04 | 0.04 |

<sup>1</sup>77 key SNPs in Omni and Ichip1, 66 key SNPs in 660Q and Ichip2 cohort.

**Supplementary Table S3.** Estimates of the average per-haplotype imputation accuracy for each *KIR* locus in four datasets.

| Locus                         | Omni<br>(n=791) | Ichip1<br>(n=6703) | 660Q<br>(n=1352) | Ichip2<br>(n=6725) |
|-------------------------------|-----------------|--------------------|------------------|--------------------|
| KIR haplotype                 | 86.43           | 85.18              | 80.79            | 82.05              |
| AvsB                          | 97.29           | 97.08              | 94.15            | 94.15              |
| <i>KIR2DS2</i>                | 98.96           | 98.96              | 95.82            | 95.62              |
| <i>KIR2DL2</i>                | 98.12           | 98.33              | 94.99            | 95.2               |
| <i>KIR2DL3</i>                | 98.75           | 98.75              | 95.41            | 95.41              |
| <i>KIR2DP1</i>                | 91.44           | 91.86              | 87.89            | 88.94              |
| <i>KIR2DL1</i>                | 91.23           | 91.44              | 88.52            | 88.1               |
| <i>KIR3DP1</i>                | 96.87           | 96.87              | 96.87            | 96.87              |
| <i>KIR2DL4</i>                | 97.08           | 97.08              | 97.08            | 97.08              |
| <i>KIR3DL1ex4<sup>l</sup></i> | 97.08           | 97.08              | 96.87            | 96.87              |
| <i>KIR3DL1ex9<sup>l</sup></i> | 96.87           | 96.87              | 96.66            | 96.66              |
| <i>KIR3DS1</i>                | 96.45           | 96.45              | 96.24            | 96.24              |
| <i>KIR2DL5</i>                | 89.77           | 89.77              | 88.1             | 88.1               |
| <i>KIR2DS3</i>                | 91.23           | 91.44              | 89.14            | 88.1               |
| <i>KIR2DS5</i>                | 96.03           | 96.24              | 95.62            | 95.82              |
| <i>KIR2DS1</i>                | 97.08           | 97.08              | 96.87            | 96.87              |
| <i>KIR2DS4TOTAL</i>           | 96.87           | 96.87              | 96.66            | 96.66              |
| <i>KIR2DS4WT</i>              | 97.91           | 97.91              | 97.49            | 97.49              |
| <i>KIR2DS4DEL</i>             | 98.75           | 98.75              | 98.75            | 98.75              |

These data are for the model fitted with the SNP intersection. The estimates are the out-of-bag (OOB) accuracy calculated during the model fitting process [6].

<sup>l</sup>*KIR3DL1* were measured by two different assays, which targeted two different exons, reported as *KIR3DL1ex4* and *KIR3DL1ex9*.

**Supplementary Table S4.** Estimates of the average per-haplotype imputation accuracy for each *HLA* locus in cases and controls.

| <b>Locus</b>    | <b>Omni</b> | <b>660Q</b> | <b>Ichip</b> |
|-----------------|-------------|-------------|--------------|
| <i>HLA-A</i>    | 97.51       | 97.58       | 97.51        |
| <i>HLA-B</i>    | 95.34       | 95.39       | 95.34        |
| <i>HLA-C</i>    | 98.41       | 98.45       | 98.41        |
| <i>HLA-DPA1</i> | 99.84       | 99.61       | 99.84        |
| <i>HLA-DPB1</i> | 96.19       | 95.92       | 96.19        |
| <i>HLA-DQA1</i> | 99.12       | 99.06       | 99.12        |
| <i>HLA-DQB1</i> | 96.54       | 96.59       | 96.54        |
| <i>HLA-DRB1</i> | 95          | 95.09       | 95           |
| <i>HLA-DRB3</i> | 98.98       | 98.79       | 98.98        |
| <i>HLA-DRB4</i> | 99.37       | 99.37       | 99.37        |
| <i>HLA-DRB5</i> | 99.67       | 99.42       | 99.67        |

**Supplementary Table S5.** HLA alleles with  $P < 10^{-5}$  in association test with overall cervical neoplasia (cases = 2143, controls = 13428) using three models.

| Dosage Model     |       |      |                       | Dominant Model   |       |      |                       | Recessive Model  |       |      |                       |
|------------------|-------|------|-----------------------|------------------|-------|------|-----------------------|------------------|-------|------|-----------------------|
| HLA Alleles      | FRQ   | OR   | <i>P</i> -values      | HLA Alleles      | FRQ   | OR   | <i>P</i> -values      | HLA Alleles      | FRQ   | OR   | <i>P</i> -values      |
| <i>DRB3*9901</i> | 0.871 | 1.24 | $2.49 \times 10^{-9}$ | <i>DRB5*0101</i> | 0.255 | 1.33 | $4.49 \times 10^{-8}$ | <i>DRB5*9901</i> | 0.744 | 0.75 | $3.71 \times 10^{-8}$ |
| <i>DRB5*9901</i> | 0.979 | 0.77 | $1.90 \times 10^{-8}$ | <i>DQB1*0603</i> | 0.106 | 0.61 | $5.14 \times 10^{-8}$ | <i>DRB3*9901</i> | 0.42  | 1.25 | $3.06 \times 10^{-6}$ |
| <i>DRB5*0101</i> | 0.255 | 1.29 | $2.26 \times 10^{-8}$ | <i>B*0702</i>    | 0.268 | 1.33 | $6.60 \times 10^{-8}$ |                  |       |      |                       |
| <i>DRB1*1501</i> | 0.27  | 1.3  | $4.06 \times 10^{-8}$ | <i>DRB1*1501</i> | 0.27  | 1.34 | $8.43 \times 10^{-8}$ |                  |       |      |                       |
| <i>DQB1*0603</i> | 0.106 | 0.63 | $5.83 \times 10^{-8}$ | <i>DRB3*9901</i> | 0.871 | 1.51 | $1.91 \times 10^{-7}$ |                  |       |      |                       |
| <i>B*0702</i>    | 0.268 | 1.26 | $3.13 \times 10^{-7}$ | <i>DRB1*1301</i> | 0.11  | 0.63 | $8.31 \times 10^{-7}$ |                  |       |      |                       |
| <i>DQAI*0103</i> | 0.113 | 0.67 | $7.10 \times 10^{-7}$ | <i>DQAI*0103</i> | 0.113 | 0.66 | $9.27 \times 10^{-7}$ |                  |       |      |                       |
| <i>DRB1*1301</i> | 0.11  | 0.65 | $1.17 \times 10^{-6}$ | <i>DRB3*0301</i> | 0.079 | 0.61 | $1.94 \times 10^{-6}$ |                  |       |      |                       |
| <i>DQB1*0602</i> | 0.253 | 1.25 | $2.04 \times 10^{-6}$ | <i>DQB1*0602</i> | 0.253 | 1.28 | $2.70 \times 10^{-6}$ |                  |       |      |                       |
| <i>DRB3*0301</i> | 0.079 | 0.63 | $4.06 \times 10^{-6}$ | <i>C*0702</i>    | 0.277 | 1.24 | $2.30 \times 10^{-5}$ |                  |       |      |                       |
| <i>C*0702</i>    | 0.277 | 1.21 | $1.53 \times 10^{-5}$ | <i>DQB1*0301</i> | 0.339 | 1.23 | $3.07 \times 10^{-5}$ |                  |       |      |                       |
| <i>DQB1*0301</i> | 0.339 | 1.19 | $1.62 \times 10^{-5}$ | <i>DRB1*1302</i> | 0.087 | 0.65 | $3.34 \times 10^{-5}$ |                  |       |      |                       |
| <i>DRB1*1302</i> | 0.087 | 0.67 | $5.90 \times 10^{-5}$ |                  |       |      |                       |                  |       |      |                       |
| <i>B*1501</i>    | 0.12  | 0.74 | $8.97 \times 10^{-5}$ |                  |       |      |                       |                  |       |      |                       |

In the dosage and dominant models, frequency was calculated as the number of individuals presenting one or two copies of HLA alleles among all individuals. In the recessive model, frequency was calculated as the number of individuals presenting two copies of HLA alleles among all individuals. FRQ, frequency; OR, odds ratio.

**Supplementary Table S6.** HLA alleles with  $P < 10^{-5}$  in association testing with HPV16-related cervical cancer (cases = 667, controls = 13428) using three models.

| Dosage Model |       |      |                       | Dominant Model |       |      |                       | Recessive Model |       |      |                       |
|--------------|-------|------|-----------------------|----------------|-------|------|-----------------------|-----------------|-------|------|-----------------------|
| HLA Alleles  | FRQ   | OR   | <i>P</i> -values      | HLA Alleles    | FRQ   | OR   | <i>P</i> -values      | HLA Alleles     | FRQ   | OR   | <i>P</i> -values      |
| DRB3*9901    | 0.868 | 1.43 | $1.27 \times 10^{-8}$ | DRB5*0101      | 0.252 | 1.48 | $5.63 \times 10^{-6}$ | DRB3*9901       | 0.418 | 1.55 | $6.68 \times 10^{-8}$ |
| DRB5*0101    | 0.252 | 1.38 | $1.79 \times 10^{-5}$ | C*0602         | 0.171 | 1.53 | $9.76 \times 10^{-6}$ | DRB5*9901       | 0.748 | 0.68 | $6.62 \times 10^{-6}$ |
| DRB5*9901    | 0.98  | 0.73 | $2.05 \times 10^{-5}$ | DRB1*1501      | 0.266 | 1.49 | $1.03 \times 10^{-6}$ |                 |       |      |                       |
| DRB1*1501    | 0.266 | 1.39 | $2.59 \times 10^{-5}$ | B*0702         | 0.264 | 1.46 | $1.85 \times 10^{-5}$ |                 |       |      |                       |
| DRB3*0101    | 0.292 | 0.7  | $3.36 \times 10^{-5}$ | DQB1*0602      | 0.251 | 1.43 | $4.98 \times 10^{-5}$ |                 |       |      |                       |
| C*0602       | 0.171 | 1.43 | $5.25 \times 10^{-5}$ | DRB3*0101      | 0.292 | 0.68 | $5.08 \times 10^{-5}$ |                 |       |      |                       |
| DRB1*0301    | 0.265 | 0.67 | $5.55 \times 10^{-5}$ | DRB1*0301      | 0.265 | 0.64 | $5.43 \times 10^{-5}$ |                 |       |      |                       |

Frequency of individuals presenting HLA alleles among HPV16 infected cases and healthy controls. Frequency for the dosage, dominant and recessive models was calculated as described in Supplementary Table 7. FRQ, frequency; OR, odds ratio.

**Supplementary Table S7.** HLA alleles with  $P < 0.005$  in association testing with HPV18-related cervical cancer (cases = 166, controls = 13428) using three models.

| Dosage Model |       |      |                  | Dominant Model |       |      |                  | Recessive Model |       |      |                  |
|--------------|-------|------|------------------|----------------|-------|------|------------------|-----------------|-------|------|------------------|
| HLA Alleles  | FRQ   | OR   | <i>P</i> -values | HLA Alleles    | FRQ   | OR   | <i>P</i> -values | HLA Alleles     | FRQ   | OR   | <i>P</i> -values |
| DPA1*0103    | 0.964 | 1.89 | 0.00039          | DQB1*0302      | 0.202 | 1.74 | 0.00135          | DPA1*0103       | 0.663 | 1.99 | 0.000434         |
| DRB1*1501    | 0.264 | 1.64 | 0.000789         | DRB1*1501      | 0.264 | 1.76 | 0.00135          | A*2402          | 0.007 | 4.54 | 0.0012           |
| DPA1*0201    | 0.274 | 0.52 | 0.00134          | DPA1*0201      | 0.274 | 0.51 | 0.00157          |                 |       |      |                  |
| DQB1*0302    | 0.202 | 1.58 | 0.00302          | DRB1*0801      | 0.045 | 2.28 | 0.00456          |                 |       |      |                  |

Frequency of individuals presenting HLA alleles among HPV18 infected cases and healthy controls. Frequency for the dosage, dominant and recessive models was calculated as described in Supplementary Table 7. FRQ, frequency; OR, odds ratio.



**Supplementary Table S8.** HLA alleles with  $P < 10^{-5}$  in association testing with squamous cell carcinoma (cases = 736, controls = 13428) and adenocarcinoma (cases = 542, controls = 13428) using three models.

|                         | Dosage Model |       |                       |                       | Dominant Model |       |      |                       | Recessive Model |       |      |                  |
|-------------------------|--------------|-------|-----------------------|-----------------------|----------------|-------|------|-----------------------|-----------------|-------|------|------------------|
|                         | HLA Alleles  | FRQ   | OR                    | <i>P</i> -values      | HLA Alleles    | FRQ   | OR   | <i>P</i> -values      | HLA Alleles     | FRQ   | OR   | <i>P</i> -values |
| Squamous cell carcinoma | DRB5*9901    | 0.979 | 0.72                  | $6.57 \times 10^{-6}$ | DQB1*0301      | 0.336 | 1.39 | $2.80 \times 10^{-5}$ | DRB5*9901       | 0.748 | 0.72 | 0.000106         |
|                         | DRB5*0101    | 0.251 | 1.38                  | $7.89 \times 10^{-6}$ | B*1501         | 0.122 | 0.54 | $4.25 \times 10^{-5}$ |                 |       |      |                  |
|                         | DQB1*0301    | 0.336 | 1.32                  | $1.95 \times 10^{-5}$ |                |       |      |                       |                 |       |      |                  |
|                         | DQB1*0602    | 0.25  | 1.35                  | $3.88 \times 10^{-5}$ |                |       |      |                       |                 |       |      |                  |
|                         | B*1501       | 0.122 | 0.55                  | $4.08 \times 10^{-5}$ |                |       |      |                       |                 |       |      |                  |
| DRB1*1501               | 0.265        | 1.36  | $5.54 \times 10^{-5}$ |                       |                |       |      |                       |                 |       |      |                  |
| Adenocarcinoma          | DRB3*9901    | 0.868 | 1.31                  | $7.38 \times 10^{-5}$ | B*0702         | 0.263 | 1.44 | 0.000182              | DPB1*0401       | 0.198 | 1.39 | 0.00162          |

Frequency of individuals presenting HLA alleles among squamous cell carcinoma cases and healthy controls. Frequency for the dosage, dominant and recessive models was calculated as described in Supplementary Table 7. FRQ, frequency; OR, odds ratio.

**Supplementary Table S9.** *HLA-Bw4* and *HLA-Bw6* association test with cervical cancer, HPV16-related, HPV18-related cervical cancer, squamous cell carcinoma and adenocarcinoma.

| Phenotypes                    | Models          | HLA group          | Frequency in case group | Frequency in control group | OR        | 95%CI     | P-values |
|-------------------------------|-----------------|--------------------|-------------------------|----------------------------|-----------|-----------|----------|
| Cervical cancer               | Recessive model | <i>HLA-Bw4/Bw4</i> | 299/2015(14.8%)         | 1665/12375(13.5%)          | 1.12      | 0.98-1.28 | 0.10     |
|                               |                 | <i>HLA-Bw4/Bw6</i> | 856/2015 (42.5%)        | 5143/12375(41.6%)          | 1.04      | 0.94-1.14 | 0.39     |
|                               |                 | <i>HLA-Bw6/Bw6</i> | 650/2015 (32.3%)        | 3876/12375(31.3%)          | 1.04      | 0.94-1.15 | 0.42     |
|                               | Dominant model  | <i>HLA-Bw4</i>     | 1245/2015(61.8%)        | 7459/12375(60.3%)          | 1.07      | 0.97-1.17 | 0.18     |
|                               |                 | <i>HLA-Bw6</i>     | 1620/2015(80.4%)        | 9988/12375(80.7%)          | 0.98      | 0.87-1.1  | 0.78     |
|                               | Dosage model    | <i>HLA-Bw4</i>     | 1245/2015(61.8%)        | 7459/12375(60.3%)          | 1.06      | 0.97-1.17 | 0.076    |
| <i>HLA-Bw6</i>                |                 | 1620/2015(80.4%)   | 9988/12375(80.7%)       | 1.01                       | 0.87-1.1  | 0.71      |          |
| HPV16-related Cervical cancer | Recessive model | <i>HLA-Bw4/Bw4</i> | 97/623(15.6%)           | 1665/12375(13.5%)          | 1.19      | 0.95-1.48 | 0.13     |
|                               |                 | <i>HLA-Bw4/Bw6</i> | 286/623(45.9%)          | 5143/12375(41.6%)          | 1.2       | 1.02-1.4  | 0.029*   |
|                               |                 | <i>HLA-Bw6/Bw6</i> | 188/623(30.2%)          | 3876/12375(31.3%)          | 0.94      | 0.8-1.13  | 0.53     |
|                               | Dominant model  | <i>HLA-Bw4</i>     | 406/623(65.2%)          | 7459/12375(60.3%)          | 1.24      | 1.04-1.46 | 0.014*   |
|                               |                 | <i>HLA-Bw6</i>     | 502/623(80.6%)          | 9988/12375(80.7%)          | 0.99      | 0.81-1.22 | 0.94     |
|                               | Dosage model    | <i>HLA-Bw4</i>     | 406/623(65.2%)          | 7459/12375(60.3%)          | 1.16      | 1.04-1.46 | 0.011*   |
| <i>HLA-Bw6</i>                |                 | 502/623(80.6%)     | 9988/12375(80.7%)       | 0.97                       | 0.81-1.22 | 0.64      |          |
| HPV18-related Cervical cancer | Recessive model | <i>HLA-Bw4/Bw4</i> | 14/155(9.0%)            | 1665/12375(13.5%)          | 0.65      | 0.37-1.11 | 0.12     |
|                               |                 | <i>HLA-Bw4/Bw6</i> | 60/155(38.7%)           | 5143/12375(41.6%)          | 0.9       | 0.64-1.23 | 0.53     |
|                               |                 | <i>HLA-Bw6/Bw6</i> | 59/155(38.1%)           | 3876/12375(31.3%)          | 1.34      | 0.97-1.87 | 0.079    |
|                               | Dominant model  | <i>HLA-Bw4</i>     | 82/155(52.9%)           | 7459/12375(60.3%)          | 0.75      | 0.54-1.02 | 0.078    |
|                               |                 | <i>HLA-Bw6</i>     | 132/155(85.2%)          | 9988/12375(80.7%)          | 1.37      | 0.88-2.14 | 0.17     |
|                               | Dosage model    | <i>HLA-Bw4</i>     | 82/155(52.9%)           | 7459/12375(60.3%)          | 0.78      | 0.54-1.02 | 0.04*    |
| <i>HLA-Bw6</i>                |                 | 132/157(85.2%)     | 9988/12375(80.7%)       | 1.26                       | 0.88-2.14 | 0.053     |          |
| Squamous cell carcinoma       | Recessive model | <i>HLA-Bw4/Bw4</i> | 112/698(16.0%)          | 1665/12375(13.5%)          | 1.22      | 1-1.51    | 0.062    |
|                               |                 | <i>HLA-Bw4/Bw6</i> | 289/698(41.4%)          | 5143/12375(41.6%)          | 1         | 0.85-1.16 | 0.97     |
|                               |                 | <i>HLA-Bw6/Bw6</i> | 238/698(34.1%)          | 3876/12375(31.3%)          | 1.13      | 0.97-1.33 | 0.14     |
|                               | Dominant model  | <i>HLA-Bw4</i>     | 428/698(61.3%)          | 7459/12375(60.3%)          | 1.05      | 0.89-1.22 | 0.58     |
|                               |                 | <i>HLA-Bw6</i>     | 558/698(79.9%)          | 9988/12375(80.7%)          | 0.96      | 0.79-1.15 | 0.65     |
|                               | Dosage model    | <i>HLA-Bw4</i>     | 428/698(61.3%)          | 7459/12375(60.3%)          | 1.08      | 0.89-1.22 | 0.18     |
| <i>HLA-Bw6</i>                |                 | 558/698(79.9%)     | 9988/12375(80.7%)       | 1.04                       | 0.79-1.15 | 0.47      |          |
| Adenocarcinoma                | Recessive model | <i>HLA-Bw4/Bw4</i> | 75/507(14.8%)           | 1665/12375(13.5%)          | 1.12      | 0.87-1.43 | 0.37     |
|                               |                 | <i>HLA-Bw4/Bw6</i> | 205/507(40.4%)          | 5143/12375(41.6%)          | 0.97      | 0.8-1.14  | 0.73     |
|                               |                 | <i>HLA-Bw6/Bw6</i> | 165/507(32.5%)          | 3876/12375(31.3%)          | 1.06      | 0.88-1.28 | 0.58     |
|                               | Dominant model  | <i>HLA-Bw4</i>     | 304/507(60.0%)          | 7459/12375(60.3%)          | 1         | 0.82-1.18 | 0.99     |
|                               |                 | <i>HLA-Bw6</i>     | 407/507(80.3%)          | 9988/12375(80.7%)          | 0.98      | 0.78-1.22 | 0.84     |
|                               | Dosage model    | <i>HLA-Bw4</i>     | 304/507(60.0%)          | 7459/12375(60.3%)          | 1.03      | 0.82-1.18 | 0.66     |
| <i>HLA-Bw6</i>                |                 | 407/507(80.3%)     | 9988/12375(80.7%)       | 1.02                       | 0.78-1.22 | 0.8       |          |

\* $P < 0.05$ .

Three models were applied: a) Dosage model, treating genotypes as 0, 1, or 2 copies, b) dominant model, treating 1 or 2 copy genotypes as present, 0 as absent, c) using recessive model to study the difference of homozygotes and heterozygotes of HLA-B, treating 2 copy genotypes as present, 0 or 1 copy as absent. Frequencies of HLA-B among cases and healthy controls are shown. *HLA-Bw4/Bw4* indicates two *HLA-Bw4* alleles, *HLA-Bw6/Bw6* indicates two *HLA-Bw6* alleles, and *HLA-Bw4/Bw6* indicates one of each. *HLA-Bw4* indicates one or two group *Bw4* alleles. *P*-values were calculated by using R code glm model with principal components 1-4; a positive odds ratio indicates a protective association with phenotypes. CI, confidence interval; OR, odds ratio.

**Supplementary Table S10.** *HLA-C1* and *HLA-C2* association testing with cervical cancer, HPV16-related and HPV18-related cervical cancer, squamous cell carcinoma and adenocarcinoma.

| Phenotypes                    | Models          | HLA group        | Frequency in case group | Frequency in control group | OR        | 95%CI     | P-value |
|-------------------------------|-----------------|------------------|-------------------------|----------------------------|-----------|-----------|---------|
| Cervical cancer               | Recessive model | <i>HLA-C1/C1</i> | 837/2086(40.1%)         | 5434/13148(41.3%)          | 0.96      | 0.87-1.05 | 0.389   |
|                               |                 | <i>HLA-C1/C2</i> | 978/2086(46.9%)         | 6054/13148(46%)            | 1.03      | 0.94-1.13 | 0.539   |
|                               |                 | <i>HLA-C2/C2</i> | 271/2086(13.0%)         | 1660/13148(12.6%)          | 1.03      | 0.9-1.19  | 0.726   |
|                               | Dominant model  | <i>HLA-C1</i>    | 1815/2086(87.0%)        | 11488/13148(87.4%)         | 0.98      | 0.84-1.11 | 0.726   |
|                               |                 | <i>HLA-C2</i>    | 1249/2086(59.9%)        | 7714/13148(58.7%)          | 1.04      | 0.96-1.15 | 0.389   |
|                               | Dosage model    | <i>HLA-C1</i>    | 1815/2086(87.0%)        | 11488/13148(87.4%)         | 0.97      | 0.84-1.11 | 0.424   |
| <i>HLA-C2</i>                 |                 | 1249/2086(59.9%) | 7714/13148(58.7%)       | 1.03                       | 0.96-1.15 | 0.424     |         |
| HPV16-related Cervical cancer | Recessive model | <i>HLA-C1/C1</i> | 232/649(35.7%)          | 5434/13148(41.3%)          | 0.79      | 0.67-0.93 | 0.005*  |
|                               |                 | <i>HLA-C1/C2</i> | 326/649(50.2%)          | 6054/13148(46%)            | 1.18      | 1.01-1.38 | 0.039*  |
|                               |                 | <i>HLA-C2/C2</i> | 91/649(14.0%)           | 1660/13148(12.6%)          | 1.13      | 0.9-1.42  | 0.29    |
|                               | Dominant model  | <i>HLA-C1</i>    | 558/649(86.0%)          | 11488/13148(87.4%)         | 0.88      | 0.71-1.11 | 0.29    |
|                               |                 | <i>HLA-C2</i>    | 417/649(64.3%)          | 7714/13148(58.7%)          | 1.27      | 1.07-1.49 | 0.005*  |
|                               | Dosage model    | <i>HLA-C1</i>    | 558/649(86.0%)          | 11488/13148(87.4%)         | 0.86      | 0.71-1.11 | 0.0103* |
| <i>HLA-C2</i>                 |                 | 417/649(64.3%)   | 7714/13148(58.7%)       | 1.16                       | 1.07-1.49 | 0.0103*   |         |
| HPV18-related Cervical cancer | Recessive model | <i>HLA-C1/C1</i> | 77/160(48.1%)           | 5434/13148(41.3%)          | 1.32      | 0.96-1.8  | 0.0786  |
|                               |                 | <i>HLA-C1/C2</i> | 65/160(40.6%)           | 6054/13148(46%)            | 0.8       | 0.58-1.1  | 0.165   |
|                               |                 | <i>HLA-C2/C2</i> | 18/160(11.2%)           | 1660/13148(12.6%)          | 0.88      | 0.54-1.44 | 0.599   |
|                               | Dominant model  | <i>HLA-C1</i>    | 142/160(88.8%)          | 11488/13148(87.4%)         | 1.14      | 0.7-1.87  | 0.599   |
|                               |                 | <i>HLA-C2</i>    | 83/160(51.9%)           | 7714/13148(58.7%)          | 0.76      | 0.56-1.04 | 0.0786  |
|                               | Dosage model    | <i>HLA-C1</i>    | 142/160(88.8%)          | 11488/13148(87.4%)         | 1.21      | 0.7-1.87  | 0.123   |
| <i>HLA-C2</i>                 |                 | 83/160(51.9%)    | 7714/13148(58.7%)       | 0.83                       | 0.56-1.04 | 0.123     |         |
| Squamous cell carcinoma       | Recessive model | <i>HLA-C1/C1</i> | 289/713(40.5%)          | 5434/13148(41.3%)          | 0.98      | 0.83-1.13 | 0.8     |
|                               |                 | <i>HLA-C1/C2</i> | 341/713(47.8%)          | 6054/13148(46%)            | 1.07      | 0.92-1.25 | 0.399   |
|                               |                 | <i>HLA-C2/C2</i> | 83/713(11.6%)           | 1660/13148(12.6%)          | 0.9       | 0.72-1.15 | 0.374   |
|                               | Dominant model  | <i>HLA-C1</i>    | 630/713(88.8%)          | 11488/13148(87.4%)         | 1.11      | 0.87-1.39 | 0.374   |
|                               |                 | <i>HLA-C2</i>    | 424/713(59.5%)          | 7714/13148(58.7%)          | 1.02      | 0.89-1.2  | 0.8     |
|                               | Dosage model    | <i>HLA-C1</i>    | 630/713(88.8%)          | 11488/13148(87.4%)         | 1.01      | 0.87-1.39 | 0.799   |
| <i>HLA-C2</i>                 |                 | 424/713(59.5%)   | 7714/13148(58.7%)       | 0.99                       | 0.89-1.2  | 0.799     |         |
| Adenocarcinoma                | Recessive model | <i>HLA-C1/C1</i> | 208/530(39.3%)          | 5434/13148(41.3%)          | 0.94      | 0.77-1.1  | 0.466   |
|                               |                 | <i>HLA-C1/C2</i> | 247/530(46.4%)          | 6054/13148(46%)            | 1.01      | 0.86-1.22 | 0.906   |
|                               |                 | <i>HLA-C2/C2</i> | 75/530(14.3%)           | 1660/13148(12.6%)          | 1.12      | 0.89-1.46 | 0.372   |
|                               | Dominant model  | <i>HLA-C1</i>    | 455/530(85.7%)          | 11488/13148(87.4%)         | 0.89      | 0.68-1.13 | 0.372   |
|                               |                 | <i>HLA-C2</i>    | 322/530(60.7%)          | 7714/13148(58.7%)          | 1.07      | 0.91-1.3  | 0.466   |
|                               | Dosage model    | <i>HLA-C1</i>    | 455/530(85.7%)          | 11488/13148(87.4%)         | 0.94      | 0.68-1.13 | 0.332   |
| <i>HLA-C2</i>                 |                 | 322/530(60.7%)   | 7714/13148(58.7%)       | 1.07                       | 0.91-1.3  | 0.332     |         |

\* $P < 0.05$ .

Frequencies of *HLA-C* among cases and healthy controls are shown. In the recessive model, *HLA-C1/C1* indicates two group 1 *HLA-C* alleles, *HLA-C2/C2* indicates two group 2 *HLA-C* alleles, and *HLA-C1/C2* indicates one of each. In the dominant model, *HLA-C1* indicates one or two group *C1* alleles, *HLA-C2* indicates one or two group *C2* alleles. In the dosage model, *HLA-C1* indicates one and two group *C1* alleles, *HLA-C2* indicates one and two group *C2* alleles. *P*-values were calculated by using R code glm model with principal components 1-4; a positive odds ratio indicates a protective association with phenotypes. CI, confidence interval; OR, odds ratio.

**Supplementary Table S11.** Control-control association test between Ichip1 and Ichip2 imputed data were conducted to check *KIR* imputation concordance using two different groups of key SNPs.

| <b>GENE</b>                 | <b><i>P</i>-value</b> | <b>Ichip1 (number of individuals passed QC)</b> | <b>Ichip2 (number of individuals passed QC)</b> | <b>KIR Frequency in Ichip1</b> | <b>KIR Frequency in Ichip2</b> |
|-----------------------------|-----------------------|-------------------------------------------------|-------------------------------------------------|--------------------------------|--------------------------------|
| <i>KIR2DS3</i> <sup>1</sup> | 6.14E-14              | 5303                                            | 5465                                            | 0.091                          | 0.138                          |
| <i>KIR2DL1</i> <sup>1</sup> | 0.000565              | 5344                                            | 5650                                            | 0.988                          | 0.979                          |
| <i>KIR2DP1</i> <sup>1</sup> | 0.00242               | 5342                                            | 5649                                            | 0.988                          | 0.981                          |
| <i>KIR2DL5</i> <sup>1</sup> | 0.0055                | 5617                                            | 5687                                            | 0.402                          | 0.427                          |
| <i>KIR2DS4DEL</i>           | 0.101                 | 6721                                            | 6696                                            | 0.82                           | 0.809                          |
| <i>KIR2DS2</i>              | 0.112                 | 6517                                            | 6650                                            | 0.519                          | 0.506                          |
| <i>KIR2DL2</i>              | 0.364                 | 6428                                            | 6645                                            | 0.513                          | 0.506                          |
| <i>KIR2DS4WT</i>            | 0.374                 | 6654                                            | 6654                                            | 0.376                          | 0.384                          |
| <i>KIR2DS5</i>              | 0.446                 | 6364                                            | 6417                                            | 0.277                          | 0.283                          |
| <i>KIR2DS4TOTAL</i>         | 0.454                 | 6677                                            | 6648                                            | 0.956                          | 0.953                          |
| <i>KIR3DL1ex4</i>           | 0.484                 | 6678                                            | 6654                                            | 0.956                          | 0.953                          |
| <i>KIR2DL3</i>              | 0.493                 | 6523                                            | 6665                                            | 0.904                          | 0.907                          |
| <i>KIR3DL1ex9</i>           | 0.55                  | 6683                                            | 6647                                            | 0.956                          | 0.953                          |
| <i>KIR2DS1</i>              | 0.594                 | 6684                                            | 6661                                            | 0.371                          | 0.376                          |
| <i>KIR3DS1</i>              | 0.902                 | 6542                                            | 6499                                            | 0.364                          | 0.365                          |

<sup>1</sup>Four *KIR* genes with *P*-value < 0.05 were not analysed further as any apparent interactions could be due to inconsistent imputation results.

## SUPPLEMENTARY FIGURES

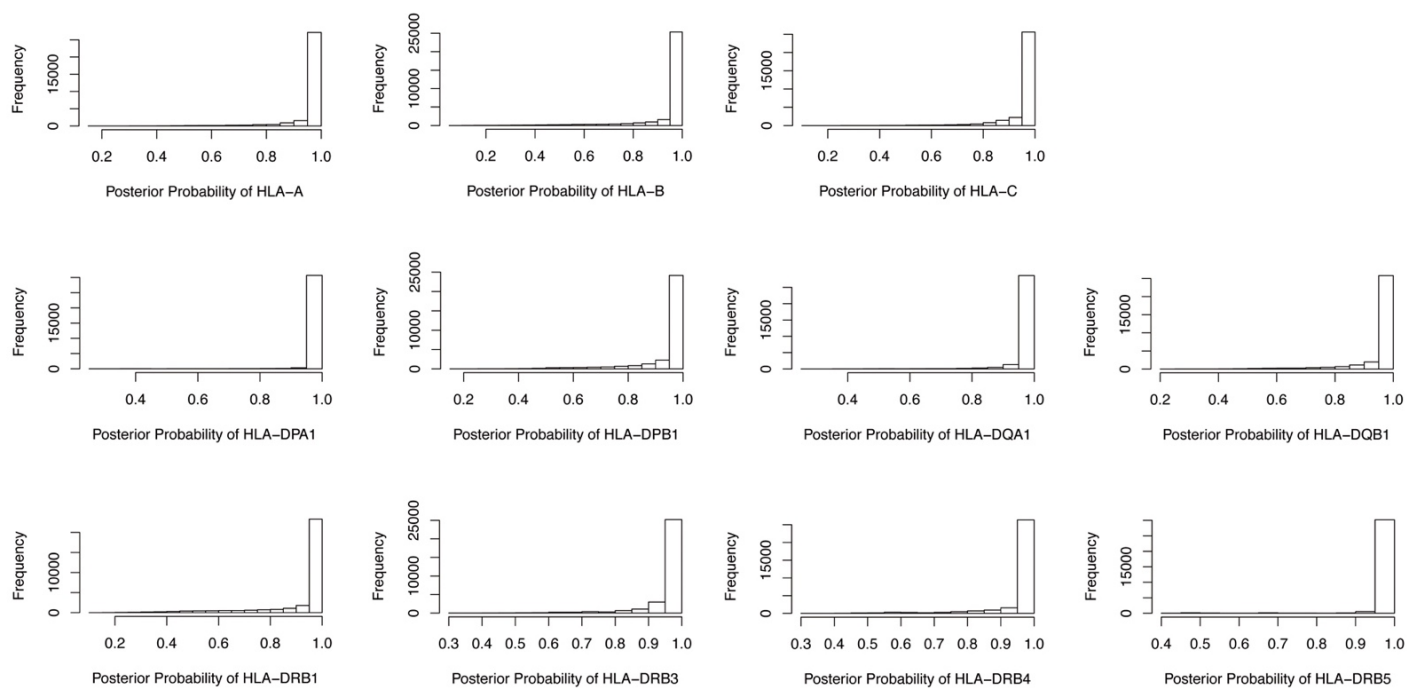

**Supplementary Figure S1.** Distribution of HLA imputation posterior probability of 11 *HLA* loci in all subjects (n=15571). Individuals with posterior probability < 0.6 were excluded in downstream association testing.

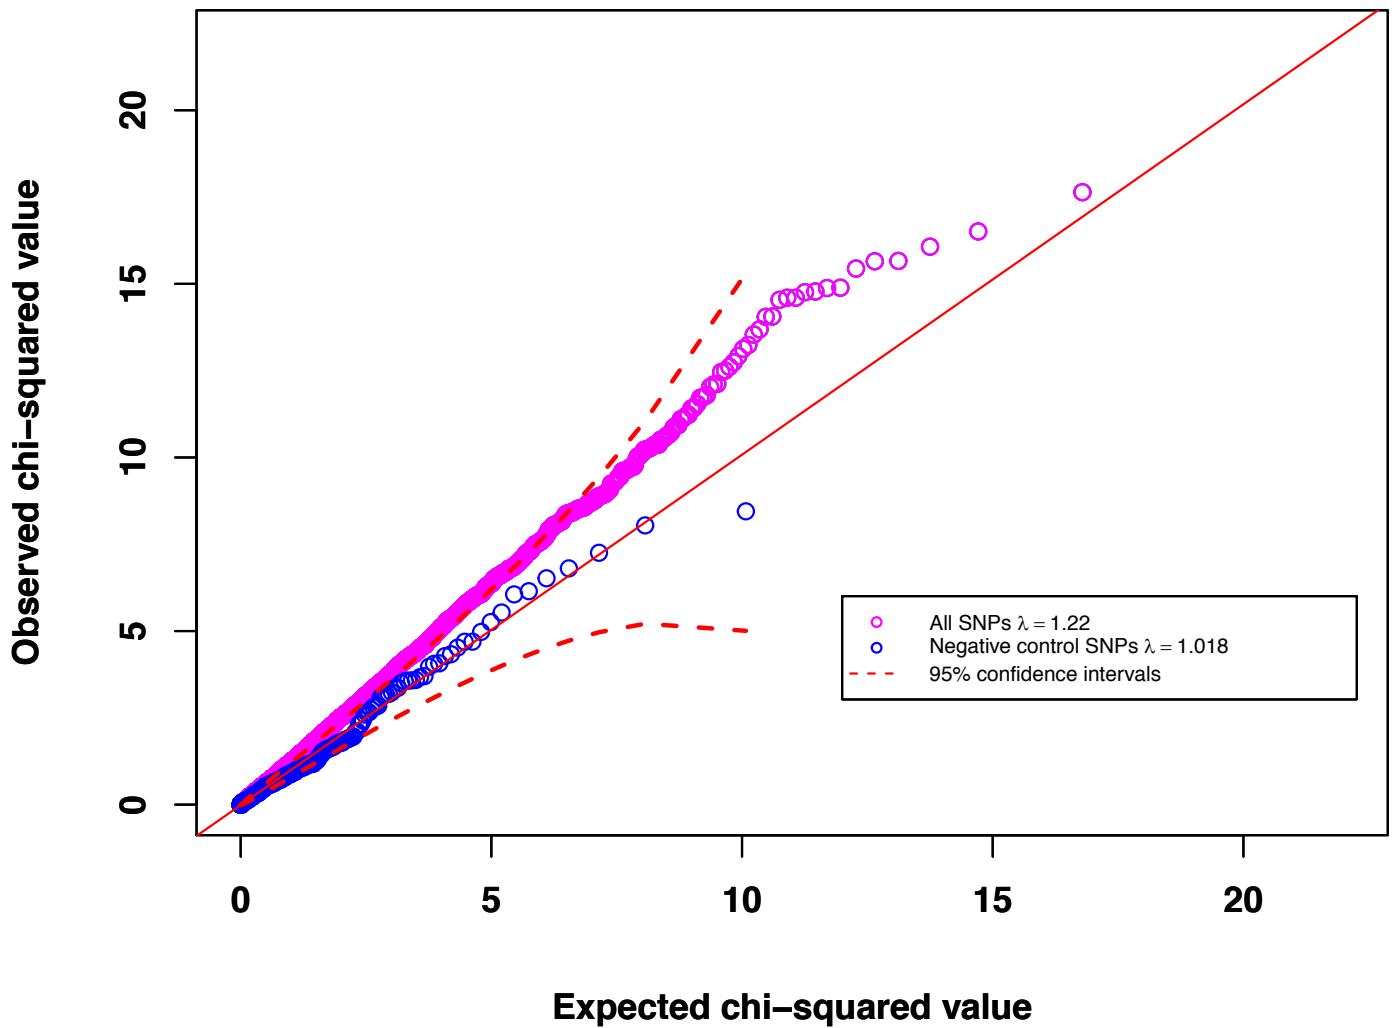

**Supplementary Figure S2.** Quantile-Quantile plot of observed versus expected chi-squared value for association analysis of cervical neoplasia. Pink, 11980 common SNPs between OmniExpress, 660-Quad and ImmunoChip datasets. The genomic inflation factor in all common SNPs listed was 1.220. Blue, a negative control set of common SNPs, excluding MHC region, associated with reading and learning disability, schizophrenia and psychosis. The genomic inflation factor in the negative control SNP list was 1.018.

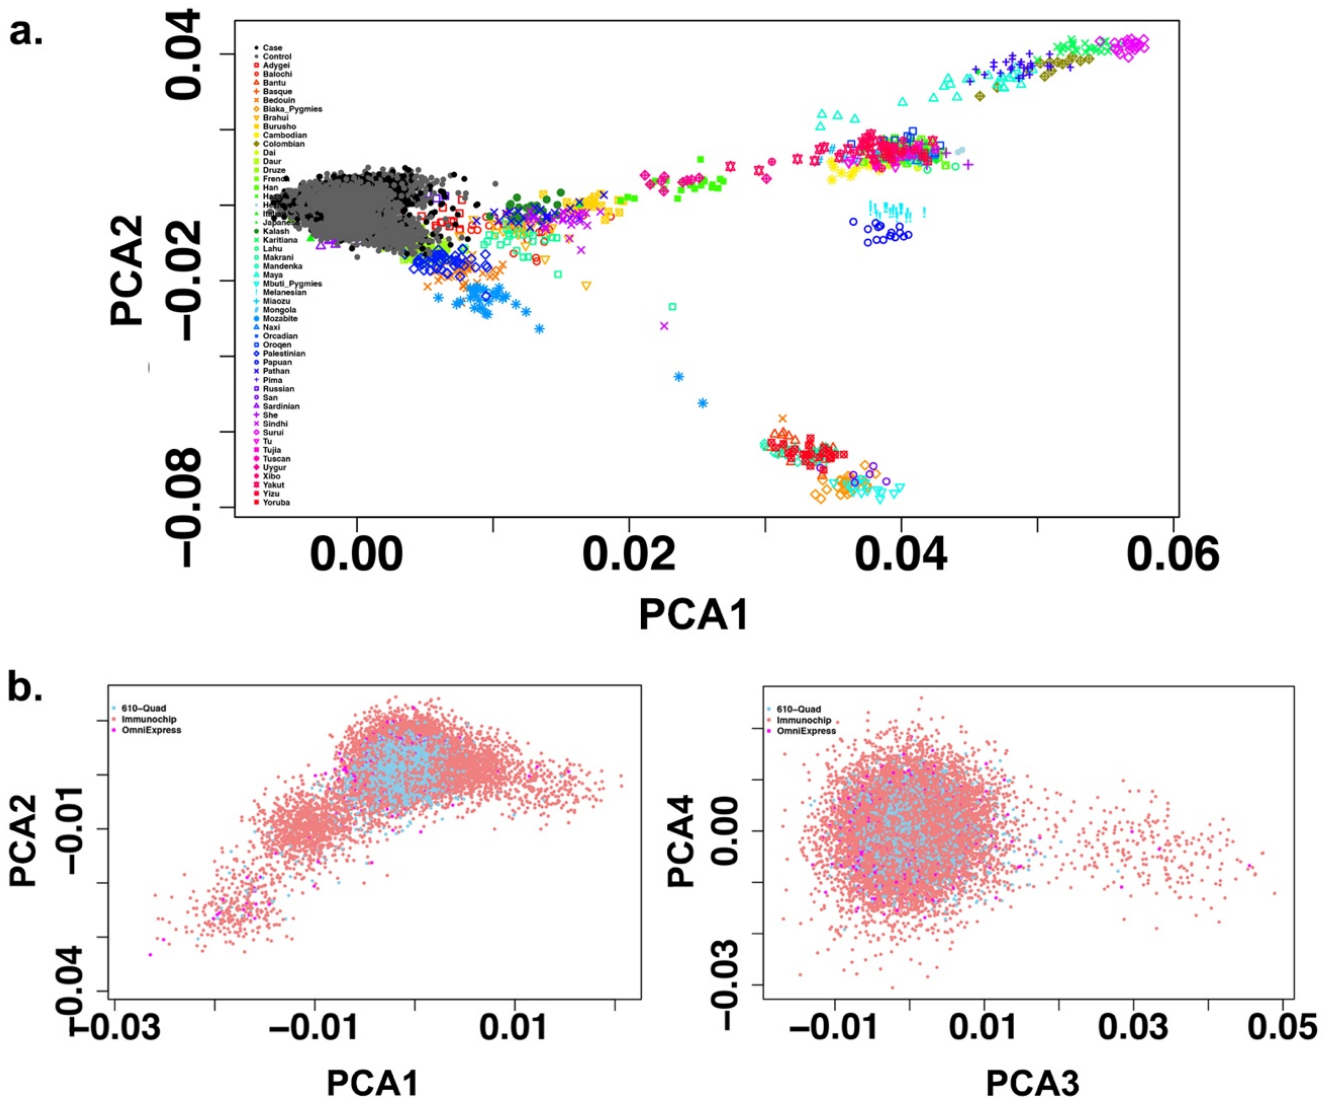

**Supplementary Figure S3.** PCA plots. All our studies were conducted among majority European descent populations, and no divergence was seen between cases and controls or between different genotype platforms. a, cases and controls are labelled by black and grey, respectively. b, all study subjects, labelled by three different colours, representing each different genotyping platforms.

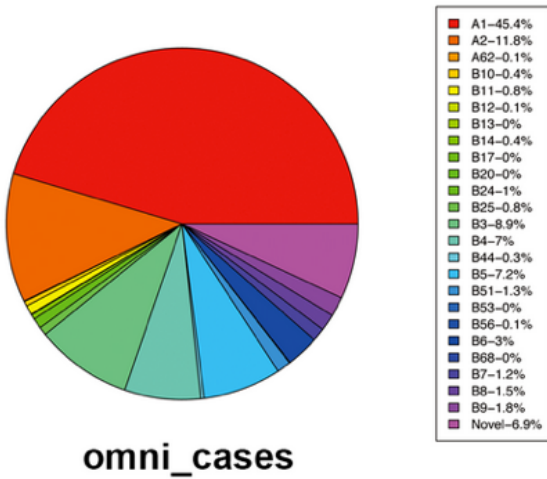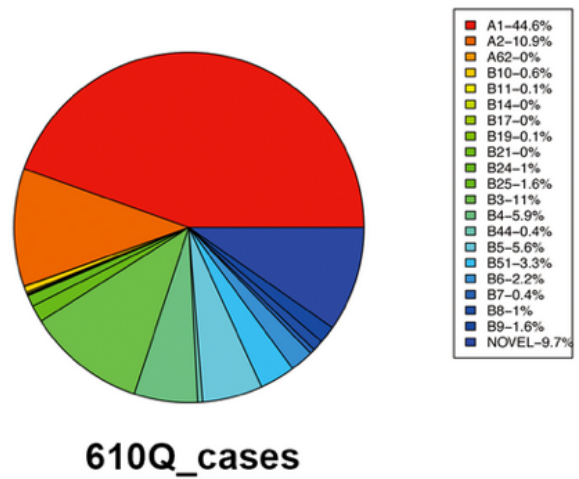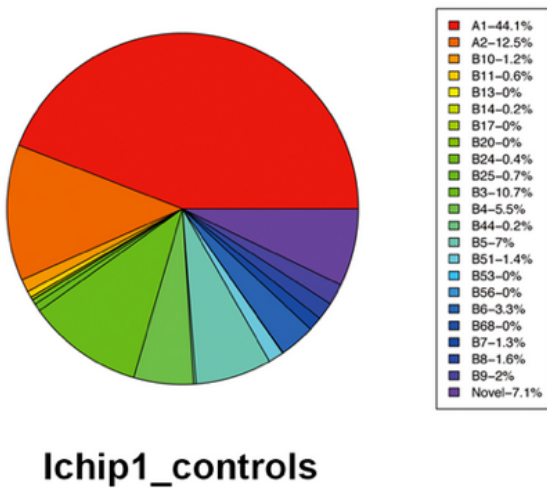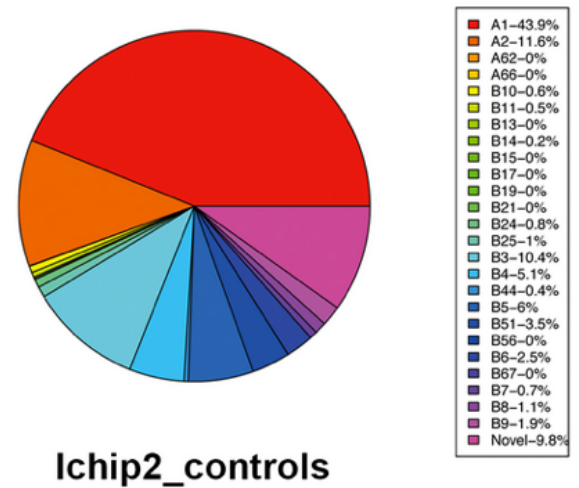

**Supplementary Figure S4.** Proportion of KIR A and B haplotype subtypes in cervical neoplasia cases and controls. Haplotypes were numbered according to Jiang *et al.* (2012)[7] based on gene content, and those prefixed with ‘N’ are considered novel, high-confidence haplotypes that were not reported in this publication.



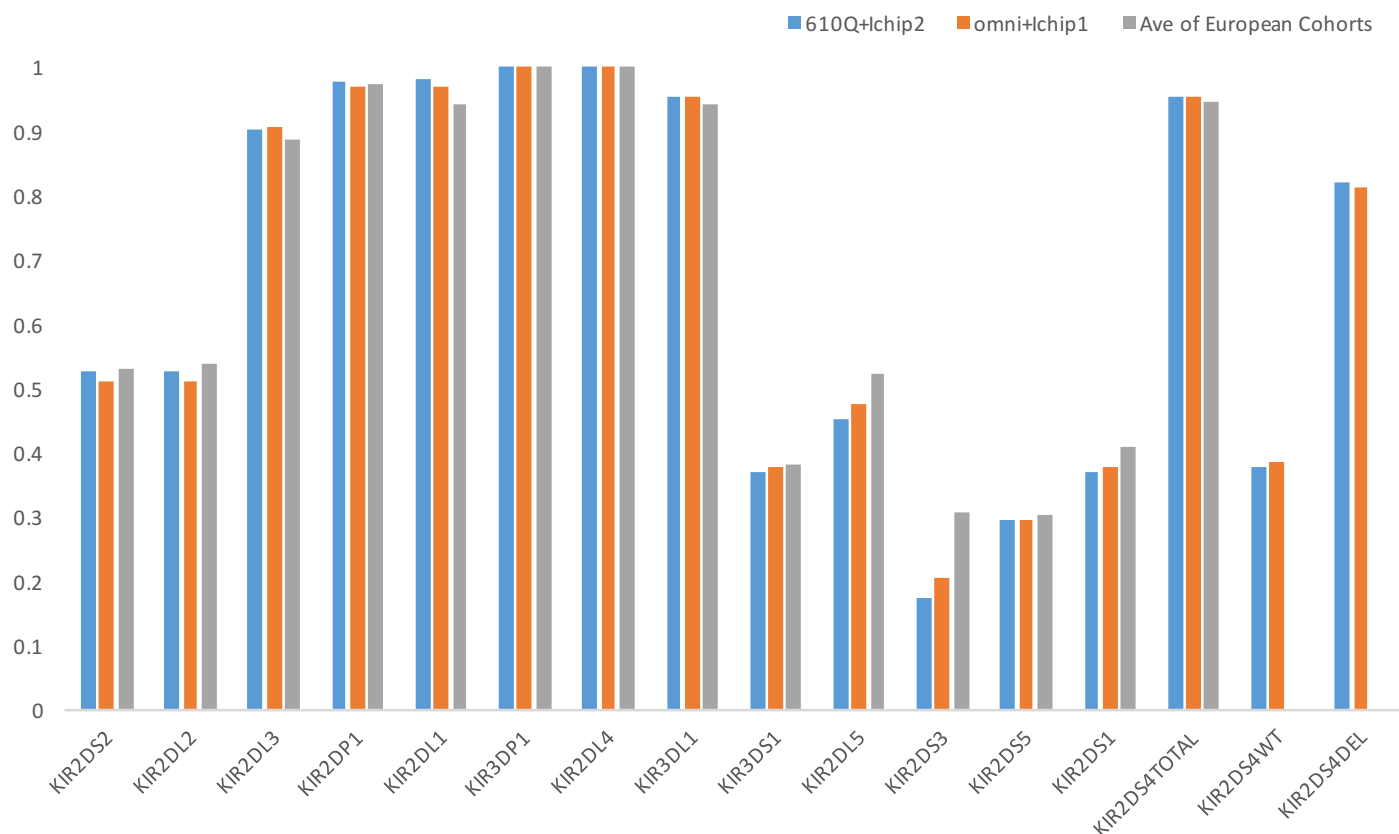

**Supplementary Figure S5.** Percentage of Omni-Ichip1 and 660Q-Ichip2 cohorts carrying each *KIR* gene relative to percentages averaged across published European cohorts. Frequencies were calculated by summing the number of individuals that carry at least one copy of a given gene and dividing by the total number of individuals. Published data is the average of *KIR* gene frequency of Serbia (n=134), England (n=584), Italy (n=217), USA (n=195), Australia (n=50). Details can be found at <http://www.allelefrequencies.net/default.asp>

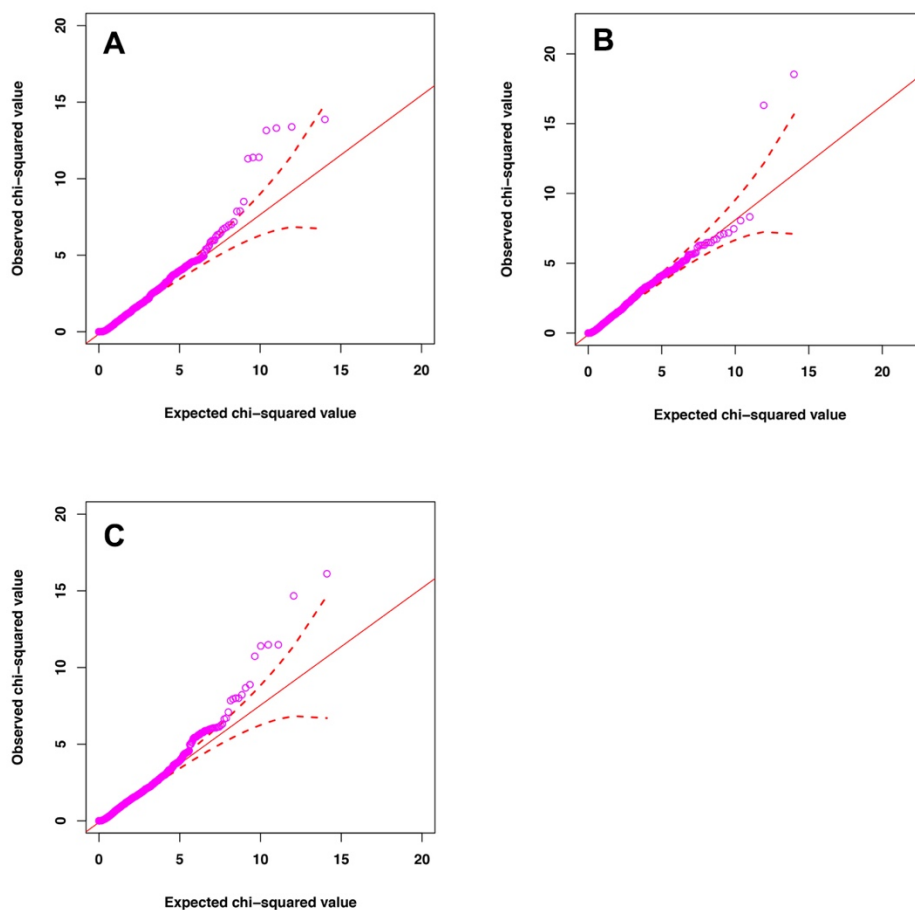

**Supplementary Figure S6.** Quantile-Quantile plots of association for KIR-HLA alleles interaction on cervical neoplasia presented: A) Omni-Ichip1, B) 660Q-Ichip2 and C) meta-analysis of Omni-Ichip1 and 660Q-Ichip2.

## SUPPLEMENTARY REFERENCES

1. Altekruze S, Lacey JJ, Brinton L, et al. Comparison of human papillomavirus genotypes, sexual, and reproductive risk factors of cervical adenocarcinoma and squamous cell carcinoma: Northeastern United States. *Am J Obstet Gynecol* **2003**; 188:657-63.
2. Velentzis LS, Sitas F, O'Connell DL, et al. Human papillomavirus 16/18 seroprevalence in unvaccinated women over 30 years with normal cytology and with high grade cervical abnormalities in Australia: results from an observational study. *BMC Infect Dis* **2014**; 14:3861.
3. Moore E, Danielewski J, Garland S, et al. Clearance of Human Papillomavirus in Women Treated for Cervical Dysplasia. *Obstet Gynaecol* **2011**; 177:101-8.
4. Madeleine MM, Johnson LG, Smith AG, et al. Comprehensive analysis of HLA-A, HLA-B, HLA-C, HLA-DRB1, and HLA-DQB1 loci and squamous cell cervical cancer risk. *Cancer research* **2008**; 68:3532-9.

5. Group T. Cytological surveillance compared with immediate referral for colposcopy in management of women with low grade cervical abnormalities: multicentre randomised controlled trial. *BMJ* **2009**; 339:b2546.
6. Vukcevic D, Traherne JA, Naess S, et al. Imputation of KIR Types from SNP Variation Data. *Am J Hum Genet* **2015**; 97:593-607.
7. Jiang W, Johnson C, Jayaraman J, et al. Copy number variation leads to considerable diversity for B but not A haplotypes of the human KIR genes encoding NK cell receptors. *Genome Res* **2012**; 22:1845-54.
